# Supplementary material
Source: PubMed Central journal article supplement (PMC11028218)
Supplement: 262_2018_2142_MOESM1_ESM.pdf [file 262_2018_2142_MOESM1_ESM.pdf]

Supplementary Figure 1. Self-limiting skin eruptions at various sites following intradermal injections.

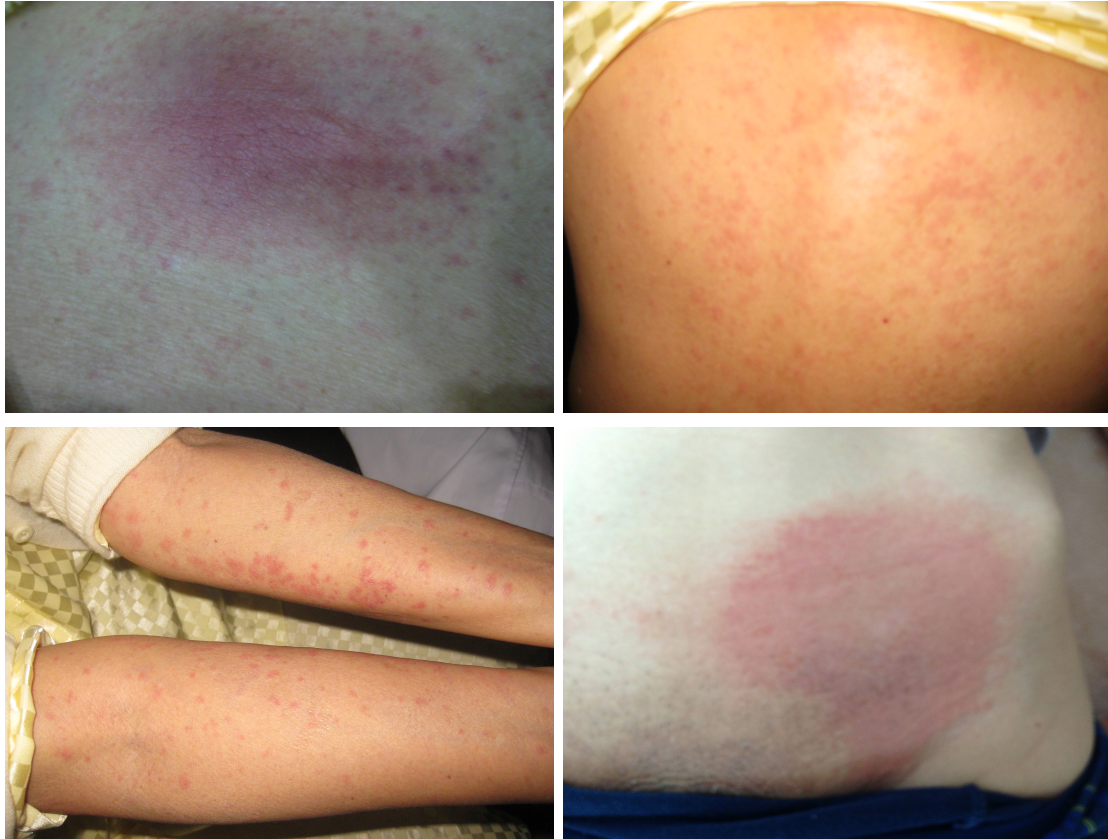

Supplementary table 1. Cancer cell lines from Cell Bank, Chinese Academy of Sciences, Shanghai, China used in protocol.

| <b>Malignancy</b>          | <b>Cell Line(s)</b>              |
|----------------------------|----------------------------------|
| Breast cancer              | MDA-MB-4355, MDA-MB-231, ZR-75-1 |
| Colorectal cancer          | CS-2, HT-29, LoVo                |
| Gastric cancer             | HGC-27, NCI-N87, MGC80-3         |
| Glioma                     | U251, U-87 MG, U-118 MG          |
| Liver cancer               | HuH-7, HCCC-9810                 |
| Melanoma                   | A-375, A-431                     |
| Non-small cell lung cancer | 95-D, SPC-A-1, SK-MES-1          |
| Ovarian cancer             | SK-OV-3, ES-2                    |
| Prostate cancer            | PC-3, 22RV1, DU145               |
| Small cell lung cancer     | NCI-H446, NCI-H1688              |
| Thyroid cancer             | TT, SW579                        |

Supplementary Table 2. Tumour characteristics and corresponding conventional therapies received in individual study patients in chronological order of enrollment. Highlighted patient represents the selected non-small cell lung cancer patient discussed in text

| Patient MRN | Age | Gender | Primary lesion | Stage | Conventional Rx | OS (mths) |
|-------------|-----|--------|----------------|-------|-----------------|-----------|
| 1490        | 61  | M      | Melanoma       | III   | Op, Ct & Rt     | S (30)    |
| 1572        | 52  | F      | Colorectal ca. | IV    | Op, Ct & Rt     | D (5)     |
| 746         | 60  | M      | Lung ca.       | IIIa  | Op              | S (41)    |
| 1562        | 37  | M      | Liver ca       | IV    | Op, Ct, Rt & Tt | S (25)    |
| 1531        | 62  | F      | Esophageal ca. | IV    | Op & Ct,        | D (4)     |
| 1616        | 70  | F      | Breast ca.     | IV    | Op, Ct & Rt     | D (5)     |
| 1612        | 56  | M      | Liver ca       | IV    | Op, Rt & Tt     | D (6)     |
| 1604        | 41  | M      | Liver ca       | IV    | Op, Rt, It & Tt | D (5)     |
| 1656        | 46  | M      | Liver ca       | IV    | Op, Rt, It & Tt | D (6)     |
| 1657        | 52  | M      | Gastric ca.    | IV    | Op & Ct         | S (15)    |
| 1682        | 41  | F      | Lung ca.       | III   | Op, Ct          | D (8)     |
| 1695        | 52  | M      | Lung ca.       | IV    | Op & Ct         | S (18)    |
| 1745        | 45  | F      | Breast ca.     | III   | Op, Rt & Ct     | S (18)    |
| 1531        | 81  | F      | Lung ca.       | IV    | Op, Ct & Tt     | D (10)    |
| 1712        | 65  | F      | Breast ca.     | IV    | Op & Ct         | S (22)    |
| 1770        | 67  | M      | Liver ca       | IV    | It              | S (19)    |
| 1899        | 44  | M      | Esophageal ca. | IV    | Op, Rt & Ct     | S (20)    |
| 1904        | 50  | F      | Ovarian ca.    | IV    | Op & Ct         | S (17)    |
| 1E09        | 59  | F      | Liver ca.      | IV    | Op & It         | S (13)    |
| 2481        | 55  | F      | Breast ca.     | IV    | Op, Rt, Ct & Tt | S (15)    |
| 980L        | 41  | F      | Kidney ca.     | IV    | Op, Rt & Tt     | D (7)     |
| 3467        | 58  | F      | Lung ca.       | IV    | Op & Ct         | D (5)     |
| 3444        | 65  | M      | Lung ca.       | IV    | Ct              | D (5)     |
| 3301        | 52  | M      | Colorectal ca. | IV    | Ct              | S (10)    |
| 3285        | 42  | M      | Glioblastoma   | IV    | Op, Rt & Ct     | D (6)     |
| 3377        | 79  | M      | Lung ca.       | IV    | Ct & Rt         | D (4)     |
| 3181        | 59  | M      | Esophageal ca. | IV    | Op, Rt & Ct     | D (16)    |
| 3301        | 44  | M      | Thyroid ca.    | IV    | Op, Rt & Ct     | D (5)     |
| 3221        | 74  | M      | Liver ca.      | IV    | It, Rt & Tt     | D (21)    |
| 3419        | 38  | M      | Liver ca.      | IV    | It              | D (5)     |
| 2879        | 51  | M      | Breast ca.     | IV    | Op, Rt, Ct & Tt | D (9)     |

MRN: medical record number; Rx: treatment; Op: surgical resection; Rt: radiotherapy, Ct: chemotherapy, Tt: target therapy; It: interventional radiological therapy; OS: overall survival; D: deceased; S: survived; mths: months
